# Supplementary material
Source: PubMed Central journal article supplement (PMC3854881)
Supplement: SD1.pdf [file SD1.pdf]

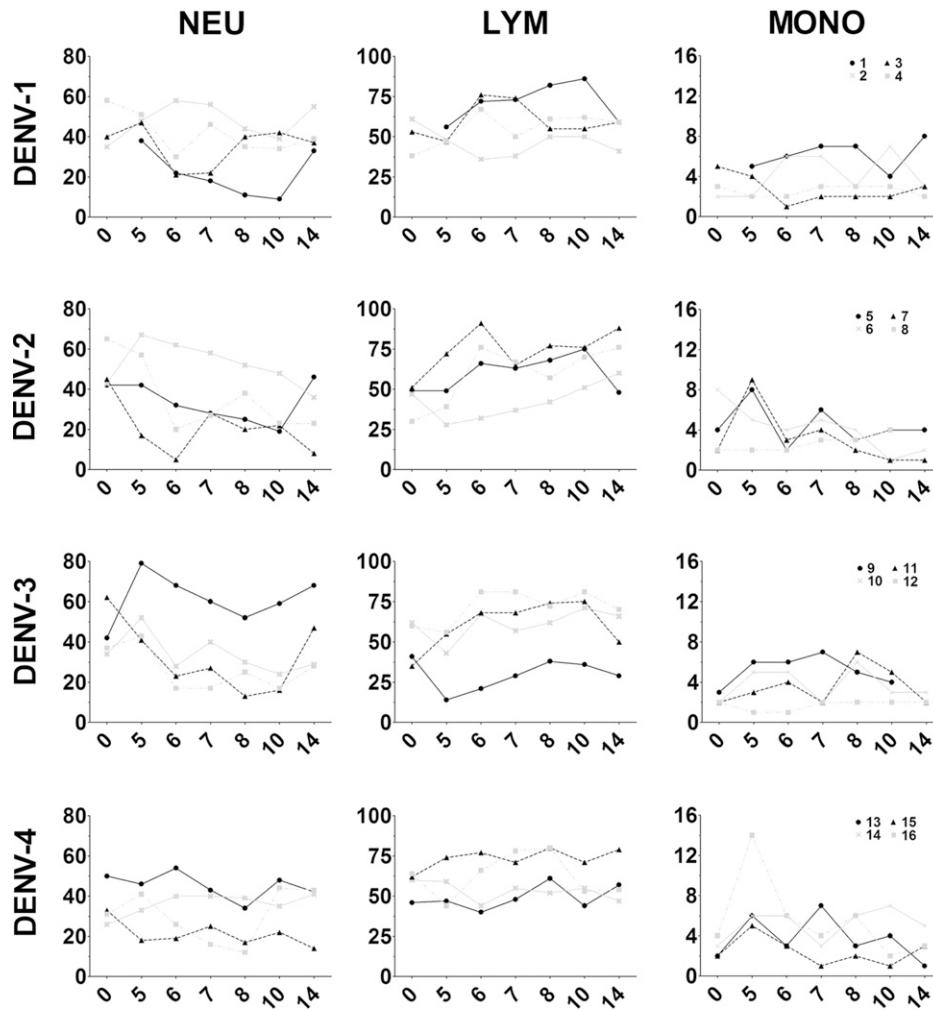

SUPPLEMENTAL FIGURE 1. Temporal changes in white blood cell differential counts after dengue virus (DENV) infection. Whole blood samples collected on days 0 (prebleed), 5, 6, 7, 8, 10, and 14 post infection were submitted to a veterinary diagnostic service laboratory service for analysis. Shown are the cell differentials (cell type % of total white blood cells measured) for neutrophils (NEU), lymphocytes (LYM), and monocytes (MONO). Day post-infection is shown on the x-axis. Animal numbers for each serotype are indicated on the right and animal numbers are the same for each panel in the same row.

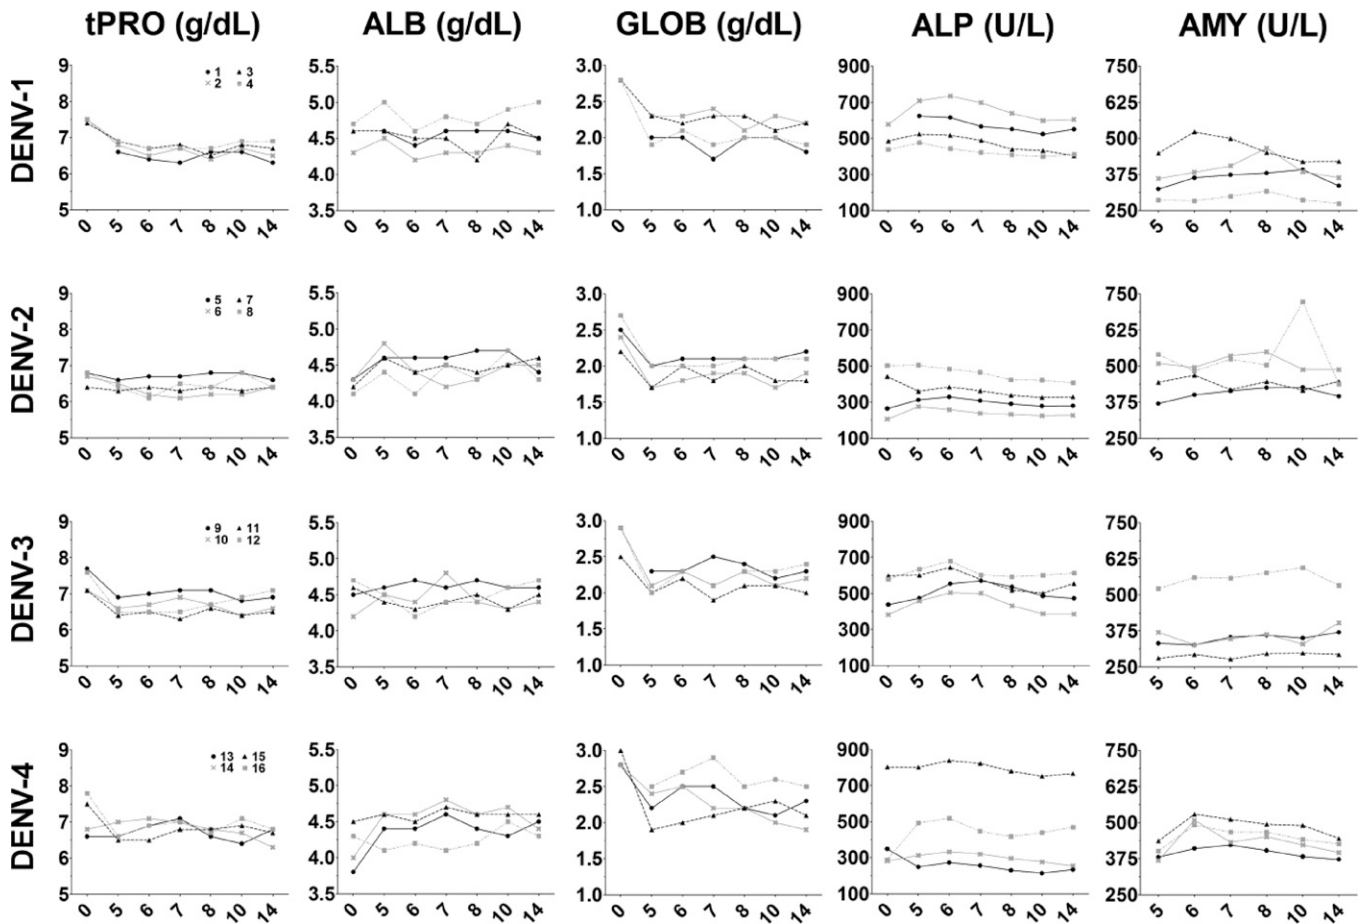

SUPPLEMENTAL FIGURE 2. Changes in serum hematology results over time after dengue virus (DENV) infection. Whole blood samples collected on days 0 (prebleed), 5, 6, 7, 8, 10, and 14 post-infection were submitted to a veterinary diagnostic service laboratory for analysis. Shown are temporal changes in serum total protein (tPRO), albumin (ALB), globulin (GLOB), alkaline phosphatase (ALP), and amylase (AMY). Day post-infection is shown on the x-axis. Animal numbers for each DENV serotype are indicated in the panel of graphs on the left and remain the same across rows.

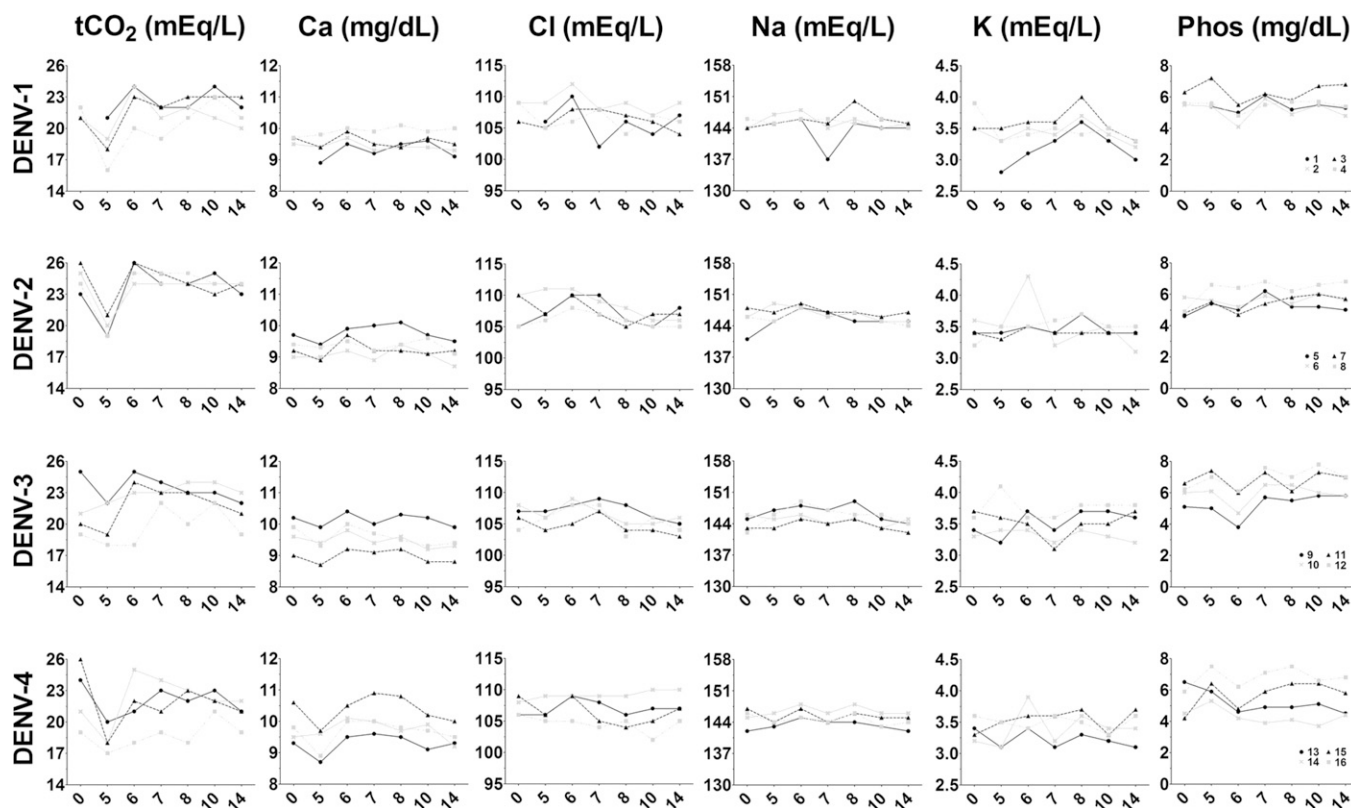

SUPPLEMENTAL FIGURE 3. Temporal fluctuation in serum electrolytes after dengue virus (DENV) infection. Whole blood samples collected on days 0 (prebleed), 5, 6, 7, 8, 10, and 14 post-infection were submitted to a veterinary diagnostic laboratory service for analysis. Shown are temporal changes in serum carbon dioxide (tCO<sub>2</sub>), calcium (Ca), chloride (Cl), sodium (Na), potassium (K), and phosphorus (Phos). Day post-infection is shown on the x-axis. Animal numbers for each serotype are indicated on the right and animal numbers are the same for each panel in the same row.

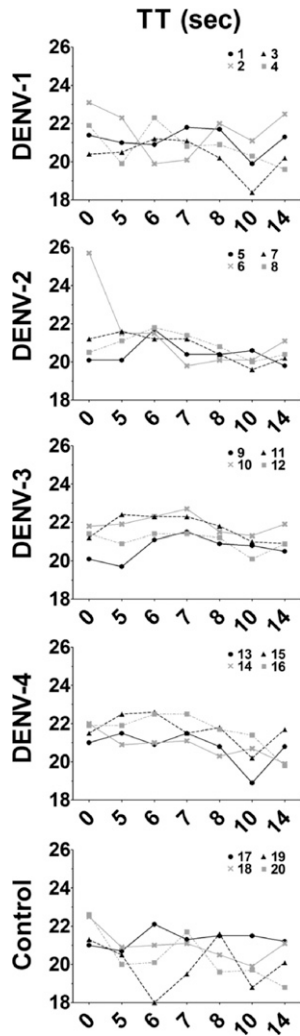

SUPPLEMENTAL FIGURE 4. Measure of thrombin time (TT) over two weeks after dengue virus (DENV) infection. Plasma was isolated on days 0 (prebleed), 5, 6, 7, 8, 10, and 14 post-infection. Each sample was loaded on an automated STA Stago compact analyzer for measuring blood coagulation factors using specific reagents from the instrument manufacturer as described in the Materials and Methods. Shown are the temporal measures of thrombin time (TT). Day post-infection is shown on the x-axis. Animal numbers for each DENV serotype are indicated at the top right of each graph.
